# Supplementary material
Source: HighWire-hosted journal article supplement (https://jnm.snmjournals.org/highwire/filestream/94231/field_highwire_adjunct_files/0/85258_Supplemental_Data.pdf)
Supplement: 85258_Supplemental_Data.pdf [file 85258_Supplemental_Data.pdf]

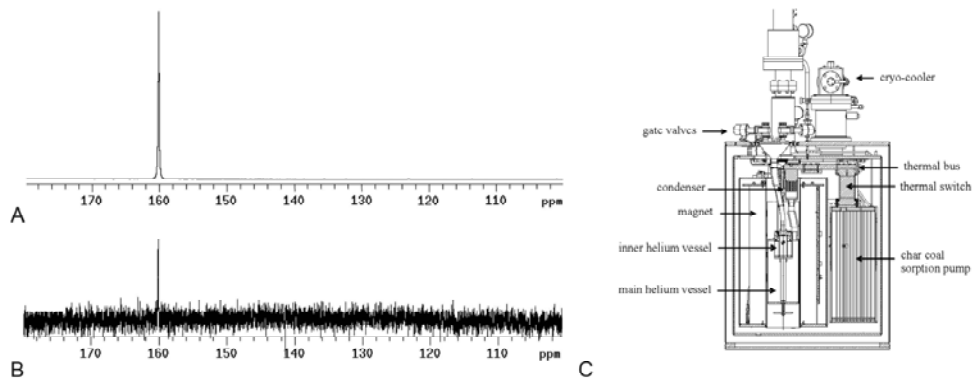

**Supplemental Figure 1. A:** Single transient  $^{13}\text{C}$  spectrum of urea that had been hyperpolarized using DNP (the  $^{13}\text{C}$  was present at natural abundance; 1.1%). **B:** Thermal equilibrium spectrum of the same sample acquired after the polarization had decayed. This spectrum was acquired over 65 h (232,128 transients) and demonstrates the large increase in signal-to-noise provided by DNP. Both spectra were acquired at 9.4 T and room temperature. Reproduced from reference<sup>1</sup>. **C:** Schematic of a polarizer for sterile use. Reproduced from reference<sup>3</sup>.
